1     **Deciphering inhibitory mechanism of coronavirus replication through host**  
2             **miRNAs-RNA-dependent RNA polymerase (RdRp) interactome**

3     Olanrewaju B. Morenikeji<sup>1\*#</sup>, Muyiwa S. Adegbaju<sup>2</sup>, Olayinka S. Okoh<sup>3</sup>, Asegunloluwa E.  
4     Babalola<sup>4</sup>, Anastasia Grytsay<sup>1</sup>, Olubumi A. Braimah<sup>1</sup>, Mabel O. Akinyemi<sup>5#</sup>, Bolaji N. Thomas<sup>6#</sup>

5  
6     <sup>1</sup> Division of Biological and Health Sciences, University of Pittsburgh at Bradford, Bradford PA  
7     16701; <sup>2</sup>Institute for Plant Biotechnology, Stellenbosch University, Stellenbosch 7600, South  
8     Africa; <sup>3</sup>Department of Chemical Sciences, Anchor University Lagos, Nigeria; <sup>4</sup>Department of  
9     Mathematical Sciences, Anchor University Lagos, Nigeria; <sup>5</sup>Department of Biological Sciences,  
10     Fairleigh Dickinson University, Madison NJ 07940; <sup>6</sup>Department of Biomedical Sciences,  
11             Rochester Institute of Technology, Rochester, NY 14623<sup>4</sup>

12  
13  
14     Olanrewaju B. Morenikeji: [obm3@pitt.edu](mailto:obm3@pitt.edu)

15     Muyiwa S. Adegbaju: [muyiwagbaju17@gmail.com](mailto:muyiwagbaju17@gmail.com)

16     Olayinka S. Okoh: [ookoh@aul.edu.ng](mailto:ookoh@aul.edu.ng)

17     Asegunloluwa E. Babalola: [ababalola@aul.edu.ng](mailto:ababalola@aul.edu.ng)

18     Anastasia Grytsay: [ang251@pitt.edu](mailto:ang251@pitt.edu)

19     Olubumi A. Braimah: [oab13@pitt.edu](mailto:oab13@pitt.edu)

20     Mabel O. Akinyemi: [larakinyemi@gmail.com](mailto:larakinyemi@gmail.com)

21     Bolaji N. Thomas: [bntsb@rit.edu](mailto:bntsb@rit.edu)

22

23     <sup>#</sup>co-senior authors

24

**\*Corresponding authors:**

Dr. Olanrewaju B. Morenikeji

Division of Biological and Health Sciences

University of Pittsburgh at Bradford

300 Campus Drive

Bradford PA 16701

Tel: (585) 490-7271

Email: [obm3@pitt.edu](mailto:obm3@pitt.edu)

25

**26 Abstract**

27 Despite what we know so far, Covid-19, caused by SARS-CoV-2 virus, remains a pandemic that  
28 still require urgent healthcare intervention. The frequent mutations of the SARS-CoV-2 virus has  
29 rendered disease control with vaccines and antiviral drugs quite difficult and challenging, with  
30 newer variants surfacing constantly. There is therefore the need for newer, effective and  
31 efficacious drugs against coronaviruses. Considering the role of RNA dependent, RNA  
32 polymerase (RdRp) as an important enzyme necessary for the virus life cycle and its  
33 conservation among coronaviruses, we investigated potential host miRNAs that can be employed  
34 as broad-range antiviral drugs averse to coronaviruses, with particular emphasis on BCoV,  
35 MERS-CoV, SARS-CoV and SARS-CoV-2. miRNAs are small molecules capable of binding  
36 mRNA and regulate expression at transcriptional or translational levels. Our hypothesis is that  
37 host miRNAs have the potential of blocking coronavirus replication through miRNA-RdRp  
38 mRNA interaction. To investigate this, we downloaded the open reading frame (ORF 1ab)

39 nucleotide sequences and used them to interrogate miRNA databases for miRNAs that can bind  
40 them. We employed various bioinformatics tools to predict and identify the most effective host  
41 miRNAs. In all, we found 27 miRNAs that target RdRp mRNA of multiple coronaviruses, of  
42 which three - hsa-miR-1283, hsa-miR-579-3p, and hsa-miR-664b-3p target BCoV, SARS-CoV  
43 and SARS-CoV-2. Additionally, hsa-miR-374a-5p has three bovine miRNAs homologs viz bta-  
44 miR-374a, bta-miR-374b, and bta-miR-374c. Inhibiting the expression of RdRp enzyme via non-  
45 coding RNA is novel and of great therapeutic importance in the control of coronavirus  
46 replication, and could serve as a broad-spectrum antiviral, with hsa-miR-1283, hsa-miR-579-3p,  
47 and hsa-miR-664b-3p highly promising.

48

49 **Running Title:** Blocking RNA virus replication via non-coding RNA

50

51 **Keywords:** miRNA, RNA-dependent RNA polymerase, prediction, markers, regulation,  
52 coronavirus

53

## 54 **Introduction**

55 The diseases caused by SARS-CoV-2, a member of the Coronaviridae family, have had profound  
56 impact on all human endeavors, leaving hardship, death and destruction in its trail (Aftab et al  
57 2020). The rate of transmission of SARS-CoV-2 from person to person is the major driver of the  
58 significant morbidity and mortality attendant to Covid-19 and its pandemic form (Gao et al.,  
59 2020; Walls et al., 2020). After a successive entry into the host, viral replication is another  
60 important step to its pathogenicity and transmission. A large portion of coronavirus genome  
61 encodes open reading frame (ORF) 1a/1b (Figure 1), which produces two precursor polyproteins

62 (pp1a) and (pp1ab), dedicated to code for multiple enzymes among which is RNA dependent,  
63 RNA polymerase (RdRp). Each of this precursor polyproteins are subsequently cleaved into non-  
64 structural proteins (nsp). The pp 1ab is cleaved into 16 nsps, of which nsp12 or RNA dependent,  
65 RNA polymerase (RdRp) is one, and pivotal for successful virus replication in the host (Gao et al  
66 2020). In addition, formation of protein complex between RdRp protein, nsp 7 and nsp 8 have  
67 been reported, as the latter duo serve as cofactor for RdRp (Kirchdoerfer and Ward 2019; Gao et  
68 al 2020). Except for retroviruses, most RNA viruses require the activity of RdRp protein for viral  
69 replication and may explain why its active site is the most conserved among these viruses (Aftab  
70 et al., 2020), thereby making it a prominent target for drug development.

71  
72 Several vaccines have now been developed and approved for use to limit COVID-19 infection in  
73 humans. However, their safety and long-term efficacy against SARS-CoV-2 is not guaranteed  
74 (Saha *et al.*, 2021). Other strategies recommended for treating disease include inhibition of RdRp  
75 activity using antiviral agents like the nucleoside analogues, Favipiravir, Galidesivir, and  
76 Remdesivir, and other plant-based compounds such as Tellimagrandin I, Saikosaponin B2,  
77 Hesperidin and Epigallocatechin gallate (Saha et al., 2021). So far, these antiviral drugs have  
78 been reported to be ineffective against SARS-CoV-2, possibly due to single nucleotide  
79 polymorphism (SNP)-induced changes culminating in conformational, structural and functional  
80 amino acids changes and the high virus mutation rate. Therefore, alternate therapeutic options  
81 that are effective against the virus must be explored. Here, we propose an alternative option that  
82 utilizes blocking RdRp transcript via host microRNAs thereby inhibiting translation of the most  
83 important protein for viral replication, leading to reduced viral propagation and pathogenicity  
84 (Fig 2).

85

86 MicroRNAs are short non-coding RNAs, of about 23 nucleotides in the introns (Trobaugh and  
87 Klimstra, 2017). They control several cellular operations transcriptionally by taking on target  
88 transcripts such as host mRNA and RNAs from the genome of pathogens, via sequence-specific  
89 interlink, influencing the function and/or stability of these targets (Morenikeji et al., 2020;  
90 Tucker et al., 2021). Several studies have shown the involvement of miRNAs in regulation of  
91 host immune responses. Morenikeji et al. (2020) demonstrated via *in silico* analysis that certain  
92 bovine miRNAs are involved in regulating specific immune response genes associated with  
93 Bovine coronavirus (BCoV) infection and were identified as drug targets and diagnostic  
94 biomarker for the virus. Additionally, miRNAs have been found in chicken binding the L gene  
95 region of Newcastle Disease virus, causing viral degradation and inhibiting replication *in vitro*  
96 (Chen et al., 2020). In humans, decrease in viral replication, translation and transmission from  
97 person to person due to binding of certain miRNAs to the genome of viruses such as Human  
98 immunodeficiency virus (HIV), Enterovirus 71 (E 71) and Human T cell leukemia virus, type I  
99 (HTLV-1) have also been reported (Nathans et al., 2009; Zheng et al 2013; Bai and Nicot 2015).  
100 More evidence on the involvement of miRNA in altering viral replication and pathogenesis have  
101 continued to emerge (Khongnomnan et al., 2015; Ingle et al., 2015; Trobaugh and Klimstra,  
102 2017), but none of these studies have examined the role of miRNA in inhibiting coronavirus  
103 replication, showing the importance of our study.

104

105 Considering the significant role of RdRp in viral replication and survival, we elucidated host  
106 miRNAs that can bind mRNA of RdRp in four coronaviruses, resulting in its disintegration,

107 thereby controlling the replication and pathogenesis of RNA viruses and opening a new door to  
108 therapeutic targets for coronaviruses.

109

## 110 **Materials and Methods**

### 111 **Sequence mining of RdRp region from the genome of various coronaviruses**

112 In this study, the analytical pipeline employed, starting from sequence curation to interactome  
113 networks, is a slight modification of our previously described model (Fig 3), (Morenikeji at al.,  
114 2020; 2021; Tucker et al., 2021). Since RdRp is one of the 16 non-structural proteins encoded by  
115 ORF 1ab gene of coronaviruses, we carried out an extensive search for ORF 1ab gene, and the  
116 nucleotide sequence of 13 selected coronaviruses, whose genomes have either been fully or  
117 partially annotated, were retrieved. These viruses are: SARS-CoV (NC\_004718.3), SARS-CoV-  
118 2 (NC\_045512.2), tytonycteris bat coronavirus (NC\_009019.1), MERS-CoV (NC\_019843.3),  
119 duck coronavirus (NC\_048214.1), Canada goose coronavirus (NC\_046965.1), BCoV  
120 (NC\_003045.1), betacoronavirus England 1 (NC\_038294.1), alphacoronavirus (NC\_046964.1),  
121 bat coronavirus (NC\_034440.1), pipistrellus bat (NC\_009020.1), rabbit coronavirus  
122 (NC\_017083.1), rodent and coronavirus (NC\_046954.1)

123

### 124 **Evolutionary analysis of RdRp in 13 coronaviruses**

125 To determine the evolutionary relationship and distance of the RdRp region from the 13  
126 coronaviruses, we constructed a phylogenetic tree using <https://ngphylogeny.fr/> with the  
127 following workflow. Preliminary multiple sequence alignment (MSA) was generated using  
128 MAFFT, followed by trimming of the MSA to focus on the informative regions using block  
129 mapping and gathering with entropy (BMGE) (Criscuolo et al., 2010). The phylogenetic tree was

130 inferred using PhyML (Guindon et al., 2010) and tree visualization carried out with interactive  
131 tree of life (iTol) (<https://itol.embl.de>). Using the MSA generated by BMGE, pairwise distance  
132 between the RdRp of the 13 coronaviruses was computed using MEGA X (Kumar et al., 2018).

133

### 134 **Prediction and network of miRNA binding sites in the RdRp region of MERS-CoV, BCoV,** 135 **SARS-CoV and SARS-CoV-2**

136 To examine whether host cellular miRNA can target coronavirus RdRp, we selected four  
137 common coronaviruses in human and cattle for further analysis. Potential miRNA binding sites  
138 in the RdRp coding regions of MERS-CoV, BCoV, SAR-CoV and SARS-Cov-2 were predicted  
139 using mirDB software (<http://mirdb.org>). Each of the RdRp coding sequence from the 4  
140 coronaviruses were used as the target sequence and human genome selected as the reference  
141 genome for miRNA prediction. After each prediction, miRNAs with a score of 60 and above  
142 were considered significant and selected for further analysis. The list of miRNAs from each  
143 coronavirus were intersected with Bioinformatic and Evolutionary Genomics (BEG) Venn  
144 diagram generator (<http://bioinformatics.psb.ugent.be/webtools/Venn/>). Based on the  
145 complementary base pairing of miRNAs and RdRp mRNA and the value of normalized binding  
146 free energy (ndG), possible miRNA-mRNA interactome network connections were determined  
147 using Cytoscape version 3.7.2, as previously described (Morenikeji et al., 2020; Tucker et al.,  
148 2021). To search for possible homologs of human miRNAs in the bovine genome, we searched  
149 the miRNA database (<https://mirbase.org>). The sequence of each of the top 25 miRNAs selected  
150 were used as query against the *Bos taurus* genome on used mirDB. Homologous bovine miRNAs  
151 were extracted and recorded for further analysis.

152

## 153 **Results**

### 154 **Dataset of RdRp nucleotides from the genome of 13 coronaviruses**

155 Our search for nucleotide sequences encoding for RdRp in coronaviruses using the keyword  
156 “1ab polyprotein” initially yielded about 59 organisms. After filtering for only coronaviruses, 13  
157 viruses, whose genome was either fully or partially annotated were subsequently selected for  
158 further analysis. The RdRp encoding regions of tylonyceris bat coronavirus, MERS-CoV, duck  
159 coronavirus, SARS-CoV, Canada goose coronavirus, BCoV, betacoronavirus England 1,  
160 alphacoronavirus, bat coronavirus, SARS-CoV-2, pipistrellus bat, rabbit coronavirus and rodent  
161 coronavirus were identified to be within the ORF 1ab gene (Table 1). Since RdRp protein is  
162 categorized to be one of the cleaved 16 non-structural proteins encoded by ORF 1ab gene, its  
163 coding region which falls between nsp11 and nsp 13, is beyond the coding region of ORF 1a  
164 gene, which partially overlaps with ORF 1ab gene and encode variants of nsp1 to nsp9 (Fig 1).  
165 Each of the RdRp nucleotides for the 13 coronaviruses were copied and added to the pipeline  
166 (Fig 3) to determine their evolutionary relationship.

167

### 168 **Evolutionary relatedness of RdRp coding sequences**

169 To confirm that RdRp coding sequence is conserved among the coronaviruses, we examined  
170 their evolutionary relatedness. The sequence analysis of RdRp reveal minor variation across the  
171 13 viruses though sharing common evolutionary origin (Fig 4). Two viruses, MERS-CoV and  
172 Betacoronavirus England 1, are not different from each other in this region, showing a pairwise  
173 distance of 0.00 (Table 2). Similarly, comparing the RdRp sequences of bat coronavirus with  
174 either MERS-CoV or Betacoronavirus England 1 indicated some level of closeness with a value  
175 of 0.18. A similar close relatedness was observed for SARS-CoV and SARS-CoV-2 having a



176 pairwise distance of 0.29. Alphacoronavirus is the most distantly related from the rest of the  
177 viruses, showing consistent higher value for the pairwise distance, further supported by the  
178 phylogenetic tree analysis(Fig 4).

179

### 180 **ORF 1 ab is conserved in BCoV, MERS-CoV, SARS-CoV and SARS-CoV-2**

181 From the genome organization of BCoV, MERS-CoV, SARS-CoV and SARS-CoV-2 (Fig 1),  
182 ORF 1ab in the viruses are very similar, indicating high level of conservation in this gene  
183 making it an excellent antiviral drug candidate. To ascertain the level of conservation of ORF  
184 1ab in BCoV, MERS-CoV, SARS-CoV and SARS-CoV-2, the well annotated ORF 1ab genes of  
185 each of the viruses were overlayed on one another and compared. Comparing the gene across the  
186 viruses, we found that ORF 1ab is highly conserved across the viruses as no conspicuous  
187 difference was noted in the arrangement of all the non-structural proteins and RdRp (Fig 1),  
188 making RdRp a good antiviral drug target.

189

### 190 **Identification of miRNA binding to RdRp of BCoV, MERS-CoV, SARS-CoV and SARS-** 191 **CoV-2**

192 In this analysis, BCoV, MERS-CoV, SARS-CoV and SARS-CoV-2 miRNAs that bind to the  
193 RNA-dependent RNA polymerase (RdRp) of coronaviruses were examined. A total of one  
194 hundred and three (103) miRNA were obtained for BCoV, seventy-eight (78) for MERS-CoV,  
195 fifty-seven (57) for SARS-CoV, while ninety-seven (97) miRNAs were found for SARS-CoV-2.  
196 To ensure the binding of miRNAs to RdRp target, significant miRNAs were filtered based on the  
197 ranking scores as described above. The filtering generated a total of sixty-six (66) miRNA for  
198 BCoV, forty-one (41) for MERS-CoV, twenty-nine (29) for SARS-CoV and fifty-three (53) for

199 SARS-CoV-2 (Fig 5). The results of complementary binding of human miRNAs to the RdRp  
200 sequence for each of the 4 coronaviruses were intersected to identify broad-spectrum miRNAs,  
201 which can possibly inhibit viral replication. As shown, there was no miRNA that could bind to  
202 the RdRp region of all 4 viruses (Fig 6a). However, we uncovered three miRNAs; hsa-miR-  
203 1283, hsa-miR-664b-3p and hsa-miR-579-3p that could bind to this region in BCoV, SARS-CoV  
204 and SARS-CoV-2 (Table 3; Fig 6b). Similarly, miRNAs that could bind to the region in at least  
205 two coronaviruses were identified, ranging from as low as one (hsa-miR-8081) for MERS-CoV  
206 and SARS-CoV to as high as nine (hsa-miR-585-5p, hsa-miR-7159-5p, hsa-miR-1305, hsa-miR-  
207 15a-5p, hsa-miR-6507-5p, hsa-miR-16-5p, hsa-miR-3065-5p, hsa-miR-195-5p and hsa-miR-15b-  
208 5p) for BCoV and MERS-CoV (Table 3).

209  
210 Interestingly, there was no miRNA concomitantly binding RdRp region in both MERS-CoV and  
211 SARS-CoV-2 (Fig 6a). The identity of the connections of miRNAs and RdRp between for  
212 coronaviruses (BCoV, MERS-CoV, SARS-CoV and SARS-CoV-2) are depicted through a  
213 network as shown in Figure 6b. This interactome reveal a possible molecular mechanism for  
214 regulating multiple coronavirus replication through miRNAs binding RdRp mRNA. Network of  
215 different nodes were created based on all identified miRNAs and potential binding sites on RdRp  
216 mRNA, while the network edges were determined through the value ndGs and correlation  
217 between each RNA. From Table 3, it is shown that 27 human miRNAs targeted multiple viruses  
218 from BCoV, MERS-CoV, SARS-CoV and SARS-CoV-2. Of particular importance, among these  
219 27 miRNAs are three miRNAs (hsa-miR-1283, hsa-miR-579-3p and hsa-miR-664b-3p) that are  
220 predicted to target BCoV, SARS-CoV and SARS-CoV-2. Furthermore, we report five miRNAs  
221 targeting SARS-CoV and SARS-CoV-2, while another five targeted BCoV and SARS-CoV.

222

### 223 **Human miRNAs homologs found in bovine genome target RdRp mRNA sequences**

224 Of the top 25 human miRNAs selected for further analysis, eight has bovine miRNA homologs  
225 as shown (Table 4). Only one of the human miRNAs, hsa-miR-374a-5p, had three bovine  
226 miRNA homologs including bta-miR-374a, bta-miR-374b, and bta-miR-374c. hsa-miR-3065-5p  
227 has two bovine homologs - bta-miR-338 and bta-miR-3065, while others have one homolog  
228 each. In all, we report 13 bovine homologs, and two of them, bta-miR-196a and bta-miR-338 are  
229 read in reverse direction while eleven are forward stranded.

230

### 231 **Discussion**

232 The genome arrangement of coronaviruses is similar and of particular importance is the open  
233 reading frame 1ab (ORF 1ab) gene, which encodes 1ab polyprotein, a protein precursor that is  
234 further cleaved into sixteen non-structural proteins (nsps). One of the sixteen nsps is RdRp that  
235 plays a vital role in RNA virus replication (Aftab et al., 2020; Gao et al 2020; Jiang et al., 2021).  
236 RdRp is a promising candidate for drug target for treating diseases caused by coronavirus  
237 because the active site is highly conserved and the protein lacks homologous counterparts in host  
238 cell (Jiang et al., 2021). Medical interventions in form of mRNA vaccines and antiviral drugs  
239 have been developed and approved to treat coronavirus disease such as Covid-19, but many of  
240 these drugs are still undergoing clinical trials. The concept behind antiviral drugs for treating  
241 Covid-19 and other diseases caused by other RNA viruses is to identify compounds which can  
242 bind to active site of the RdRp enzymes and prevent its catalytic activity, which leads to viral  
243 replication (Yang et al., 2011; Markland et al., 2000; Elfiky 2016; Elfiky et al., 2017; Elfiky and  
244 Ismail 2019; Ezat et al., 2019; Wang et al., 2020). However, major concern on the efficacy of the

245 antiviral drugs remains, necessitating exploring alternative options, including preventing RdRp  
246 protein translation. To the best of our knowledge, the use of non-coding RNA such as miRNAs  
247 as an alternative route has not been explored as antiviral drug option. Since miRNA can bind  
248 directly to the genome of RNA virus or cause changes in the host transcriptome facilitated by the  
249 virus, it is noteworthy that finding host miRNA that can bind directly to the RdRp region of  
250 coronaviruses may provide insight on effective manipulation to control the viral replication/load  
251 in the host and provide a remarkable alternative treatment.

252

253 To have an effective antiviral drug, it is important that a virus target be conserved. Therefore, we  
254 identify the conservation of miRNA binding site in the RdRp sequence of multiple coronaviruses  
255 through evolutionary analysis. First, 13 annotated RdRp nucleotide sequences were used to  
256 define the conservation of this region and construct a phylogenetic tree. Most of the viral species  
257 examined belong to the betacoronavirus subfamily, with our result showing high similarity  
258 between them, given this region as a potential drug target. Interestingly, the pairwise distance  
259 result between MERS-CoV and Betacoronavirus England 1 show no difference in this region for  
260 both viruses, indicating that they are likely to have the same binding site for host miRNAs. A  
261 close similarity in the RdRp region of SARS-CoV and SARS-CoV-2 shows the virus evolved  
262 from a common origin, in agreement with previous findings (Wu et al 2020; Aftab et al 2020).  
263 The genetic conservation of RdRp gene across multiple viruses shows a strong positive selection  
264 for this region and justifies the fact that the enzyme coded by this region is important for almost  
265 all RNA virus replication, strengthening its choice for miRNA drug targeting. It is puzzling that  
266 the magnitude of the difference in pathogenicity, rate of transmission and virulence between  
267 SARS-CoV and SARS-CoV-2 is only caused by single nucleotide mutations (Ceraolo and

268 Giorgi, 2020; Lu et al., 2020; Kruse, 2020; Nguyen et al., 2020; Wang et al., 2020). Thus, the  
269 slight pairwise distance observed between the RdRp sequences of SARS-CoV and SARS-CoV-2  
270 may have remarkable implications on the number of miRNA which can bind concomitantly with  
271 both viruses. Several regions of RNA viruses mutate at a faster rate as a mechanism to escape  
272 host immune system reaction, however, a slower mutation rate at the RdRp region means a  
273 miRNA could be broad spectrum antiviral drug for many viruses.

274

275 Remarkably, our study uncovered several miRNAs that bound to the RdRp sequence of  
276 coronaviruses including SARS-CoV, SARS-CoV-2 MERS-CoV and BCoV. The presence of  
277 human miRNA homologs in bovine genome is of great importance as this is indicative of the  
278 crucial roles these miRNAs play as preserved by evolutionary forces or selection. Additionally,  
279 some of the miRNAs have multiple binding sites within the RdRp region thereby increasing the  
280 binding probability and reducing off-target effects, strengthening their choice for possible  
281 antiviral molecule. This is contrary to the submission of Thorg et al. (2017), which stated that the  
282 common location of the miRNA binding site is the UTRs of the viral genome. Conversely, our  
283 results align with similar study in chicken where Wang et (2021) identified multiple miRNA  
284 binding sites within the L gene of the NDV and infectious bursal disease virus (IBDV). Wang et  
285 al (2021) found the overexpression of ggam-miR-21 inhibiting VP1 translation in chicken  
286 fibroblasts and suppresses overall viral replication.

287

288 We identified some miRNAs including hsa-miR-1283, hsa-miR-664b-3p, hsa-miR-579-3p,  
289 which targeted multiple regions in the RdRp sequence of BCoV, SARS-CoV, and SARS-CoV-2,  
290 these miRNAs have been previously linked with onco-protective roles, indicating their growth

291 regulatory function. For example, hsa-miR-1283 has been linked with cardio-protection and  
292 inhibition of apoptosis (Liu *et al.*, 2021), thereby blocking oncogenesis. In addition, this miRNA  
293 has also been implicated in hypertension (Chen *et al.*, 2021). hsa-miR-579-3p, on the other hand  
294 has been reported to be associated with growth control and tumor suppression via control of  
295 melanoma progression (Fattore *et al.*, 2016; Kalhori *et al.*, 2019), while hsa-miR-664b-3p is  
296 reported to play a critical role in regulating cancer progression (Liu *et al.*, 2020). From our study,  
297 an upregulation or administration of any of the three miRNAs might play a dual role of blocking  
298 viral replication/degradation and inhibition of cancer progression.

299

### 300 **Conclusion**

301 In summary, we utilized several computational approaches to examine genome plasticity and  
302 elucidate potential host miRNAs that could bind to the RdRp sequence region of coronaviruses.  
303 Although viral genome is known to be variable, we report high conservation of RdRp sequence  
304 in multiple coronaviruses species, indicating evolutionary favorability, hence a candidate  
305 signature for genome targeting. In all, this study also provides an insight on possible alternative  
306 route for targeting and inhibiting viral replication via host non-coding RNA (miRNAs) to combat  
307 disease rather than common anti-coronavirus drug, based on inhibiting RdRp enzymatic  
308 activities. In particular, hsa-miR-1283, hsa-miR-664b-3p, hsa-miR-579-3p and hsa-miR-374a-5p  
309 with bovine homologs bta-miR-374a, bta-miR-374b, and bta-miR-374c are very promising. This  
310 study opens the door for developing non-coding RNAs as a broad-spectrum antiviral therapy and  
311 lays a foundation for further investigation to validate the effective binding of identified miRNAs  
312 to RdRp sequences of coronaviruses through *in vivo* or *in vitro* analysis.

313

314

315 **References**

- 316 Aftab, S. O., Ghouri, M. Z., Masood, M. U., Haider, Z., Khan, Z., Ahmad, A. and Munawar, N.  
317 (2020). Analysis of SARS-CoV-2 RNA-dependent RNA polymerase as a potential  
318 therapeutic drug target using a computational approach. *Journal of translational*  
319 *medicine*, 18(1), 1-15. doi: 10.1186/s12967-020-02439-0.  
320
- 321 Bai, X.T. and Nicot, C. (2015). miR-28-3p is a cellular restriction factor that inhibits human T  
322 cell leukemia virus, type 1 (HTLV-1) replication and virus infection. *J. Biol. Chem.* 290,  
323 5381–5390  
324
- 325 Chen, W., Liu, T., Liang, Q., Chen, X., Tao, W., Fang, M., Xiao, Y. and Chen, L. (2021). miR-  
326 1283 Contributes to Endoplasmic Reticulum Stress in the Development of Hypertension  
327 Through the Activating Transcription Factor-4 (ATF4)/C/EBP-Homologous Protein  
328 (CHOP) Signaling Pathway. *Medical Science Monitor: International Medical Journal of*  
329 *Experimental and Clinical Research*, 27, e930552-1. doi: 10.12659/MSM.930552.  
330
- 331 Ceraolo, C. and Giorgi, F. M. (2020). Genomic variance of the 2019-nCoV coronavirus.  
332 *Journal of medical virology*, 92(5), 522-528.  
333
- 334 Criscuolo, A. and Gribaldo, S. (2010). BMGE (Block Mapping and Gathering with Entropy): a  
335 new software for selection of phylogenetic informative regions from multiple sequence  
336 alignments. *BMC Evolutionary Biology*, 10:210  
337
- 338 Elfiky, A. A. (2016). Zika viral polymerase inhibition using anti-HCV drugs both in market and  
339 under clinical trials. *Journal of Medical Virology*, 88(12), 2044-2051.
- 340 Elfiky, A. A., Mahdy, S. M., and Elshemey, W. M. (2017). Quantitative structure-activity  
341 relationship and molecular docking revealed a potency of anti-hepatitis C virus drugs  
342 against human corona viruses. *Journal of Medical Virology*, 89(6), 1040-1047.  
343
- 344 Elfiky, A. A. and Ismail, A. (2019). Molecular dynamics and docking reveal the potency of  
345 novel GTP derivatives against RNA-dependent RNA polymerase of genotype 4a HCV.  
346 *Life Sciences*, 238, 116958.  
347
- 348 Ezat, A. A., Elfiky, A. A., Elshemey, W. M. and Saleh, N. A. (2019). Novel inhibitors against  
349 wild-type and mutated HCV NS3 serine protease: an in silico study. *VirusDisease*, 30(2),  
350 207-213.  
351
- 352 Fattore, L., Mancini, R., Acunzo, M., Romano, G., Laganà, A., Pisanu, M. E., Malpicci, D.,  
353 Madonna, G., Mallardo, D., Capone, M., Fulciniti, F., Mazzucchelli, L., Botti, G., Croce,  
354 C. M., Ascierio, P. A. and Ciliberto, G. (2016). miR-579-3p controls melanoma  
355 progression and resistance to target therapy. *Proceedings of the National Academy of*  
356 *Sciences*, 113(34), E5005-E5013.  
357
- 358 Gao, Y., Yan, L., Huang, Y., Liu, F., Zhao, Y., Cao, L. and Rao, Z. (2020). Structure of the  
359 RNA-dependent RNA polymerase from COVID-19 virus. *Science*, 368(6492), 779-782.  
360

- 361 Guindon, S., Dufayard, J. F., Lefort, V., Anisimova, M., Hordijk, W. and Gascuel, O.  
362 (2010). New Algorithms and Methods to Estimate Maximum-Likelihood Phylogenies:  
363 Assessing the Performance of PhyML 3.0. *Systematic Biology*, 59:307–321  
364  
365
- 366 Ingle, H., Kumar, S., Raut, A. A., Mishra, A., Kulkarni, D. D., Kameyama, T., Takaoka, A.,  
367 Akira, S. and Kumar, H. (2015). The microRNA miR-485 targets host and influenza virus  
368 transcripts to regulate antiviral immunity and restrict viral replication. *Science signaling*,  
369 8(406), ra126-ra126.
- 370 Jiang, Y., Yin, W. and Xu, H. E. (2021). RNA-dependent RNA polymerase: Structure,  
371 mechanism, and drug discovery for COVID-19. *Biochemical and biophysical research*  
372 *communications*, 538, 47-53. doi: 10.1016/j.bbrc.2020.08.116.  
373
- 374 Kruse, R. L. (2020). Therapeutic strategies in an outbreak scenario to treat the novel coronavirus  
375 originating in Wuhan, China. *F1000Research*, 9.  
376
- 377 Kumar S, Stecher, G., Li, M., Knyaz, C. and Tamura, K. (2018). MEGA X: Molecular  
378 Evolutionary Genetics Analysis across computing platforms. *Molecular Biology and*  
379 *Evolution* 35:1547-1549.  
380
- 381 Kalhori, M. R., Irani, S., Soleimani, M., Arefian, E. and Kouhkan, F. (2019). The effect of  
382 miR-579 on the PI3K/AKT pathway in human glioblastoma PTEN mutant cell lines.  
383 *Journal of Cellular Biochemistry*, 120(10), 16760-16774. DOI: 10.1002/jcb.28935.  
384
- 385 Khongnomnan, K., Makkoch, J., Poomipak, W., Poovorawan, Y. and Payungporn, S. (2015).  
386 Human miR-3145 inhibits influenza A viruses replication by targeting and silencing viral  
387 PB1 gene. *Experimental Biology and Medicine*, 240(12), 1630-1639.  
388
- 389 Kirchdoerfer, R.N., Ward, A.B. Structure of the SARS-CoV nsp12 polymerase bound to nsp7  
390 and nsp8 co-factors. *Nat Commun* 10, 2342 (2019). [https://doi.org/10.1038/s41467-019-](https://doi.org/10.1038/s41467-019-10280-3)  
391 [10280-3](https://doi.org/10.1038/s41467-019-10280-3)  
392
- 393 Liu, C., Liu, H., Sun, Q. and Zhang, P. (2021). MicroRNA 1283 alleviates cardiomyocyte  
394 damage caused by hypoxia/reoxygenation via targeting GADD45A and inactivating the  
395 JNK and p38 MAPK signaling pathways. *Kardiologia Polska (Polish Heart Journal)*,  
396 79(2), 147-155.  
397
- 398 Liu, T., Meng, W., Cao, H., Chi, W., Zhao, L., Cui, W., Yin, H. and Wang, B. (2020). lncRNA  
399 RASSF8-AS1 suppresses the progression of laryngeal squamous cell carcinoma via  
400 targeting the miR-664b-3p/TLE1 axis. *Oncology Reports*, 44(5), 2031-2044.  
401
- 402 Lu, R., Zhao, X., Li, J., Niu, P., Yang, B., Wu, H., Wang, W., Song, H., Huang, B., Zhu, N., Bi,  
403 Y., Ma, X., Zhan, F., Wang, L., Hu, T., Zhou, H., Hu, Z., Zhou, W., Zhao, L., Chen, J.,  
404 Meng, Y., Wang, J., Lin, Y., Yuan, J., Xie, Z., Ma, J., Liu, W.J., Wang, D., Xu, W.,  
405 Holmes, E.C., Gao, G.F., Wu, G., Chen, W., Shi, W. and Tan, W. (2020). Genomic



- 406 characterization and epidemiology of 2019 novel coronavirus: implications for virus  
407 origins and receptor binding. *The Lancet*, 395(10224), 565-574  
408
- 409 Markland, W., McQuaid, T. J., Jain, J. and Kwong, A. D. (2000). Broad-spectrum antiviral  
410 activity of the IMP dehydrogenase inhibitor VX-497: a comparison with ribavirin and  
411 demonstration of antiviral additivity with alpha interferon. *Antimicrobial agents and*  
412 *chemotherapy*, 44(4), 859-866.  
413
- 414 Morenikeji O. B., Wallace, M., Strutton, E., Bernard, K., and Thomas, B. N. (2020) Integrative  
415 Network Analysis of Predicted mi-RNA Targets Regulating Expression Immune  
416 response Genes in Bovine Coronavirus Infection. *Front. Genet.*,  
417 <https://doi.org/10.3389/fgene.2020.584392>  
418
- 419 Morenikeji, O. B., Bernard, K., Strutton, E., Wallace, M., and Thomas, B. N. (2021)  
420 Evolutionary conserved long non-coding RNA regulates gene expression in Cytokine  
421 Storm during COVID-19 *Front. Bioeng. Biotechnol.*,  
422 <https://doi.org/10.3389/fbioe.2020.582953>  
423
- 424 Nathans, R., Chu, C.Y., Serquina, A. K., Lu, C. C., Cao, H. and Rana, T.M. (2009) Cellular  
425 microRNA and P bodies modulate host-HIV-1 interactions. *Mol. Cell* 34, 696–709  
426
- 427 Nguyen, T. M., Zhang, Y. and Pandolfi, P. P. (2020). Virus against virus: a potential treatment  
428 for 2019-nCov (SARS-CoV-2) and other RNA viruses. *Cell Research*, 30(3), 189-190.  
429
- 430 Saha, S., Nandi, R., Vishwakarma, P., Prakash, A. and Kumar, D. (2021). Discovering potential  
431 RNA dependent RNA polymerase inhibitors as prospective drugs against COVID-19: an  
432 in silico approach. *Frontiers in Pharmacology*, 12, 267.  
433
- 434 tenOever, B, R. (2013) RNA viruses and the host microRNA machinery. *Nat Rev Microbiol.*  
435 Mar;11(3):169-80. doi: 10.1038/nrmicro2971.  
436
- 437 Thorg et al 2017  
438
- 439 Trobaugh, D. W. and Klimstra, W. B. (2017). MicroRNA regulation of RNA virus replication  
440 and pathogenesis. *Trends in Molecular Medicine*, 23(1), 80-93.  
441
- 442 Tucker, A.R., Salazar, N.A., Ayoola, A.O., Memili, E., Thomas, B.N. and Morenikeji, O.  
443 B.(2021) Regulatory network of miRNA, lncRNA, transcription factor and target  
444 immune response genes in bovine mastitis. *Sci Rep.* 2021 Nov 9;11(1):21899. doi:  
445 10.1038/s41598-021-01280-9.
- 446 Wang, Y. S., Ouyang, W., Pan, Q, X., Wang, X. L., Xia, X. X., Bi, Z. W., Wang, Y. Q., Wang,  
447 X. M. (2013) Overexpression of microRNA gga-miR-21 in chicken fibroblasts  
448 suppresses replication of infectious bursal disease virus through inhibiting VP1  
449 translation. *Antiviral Res.* 2013;100(1):196–201.  
450

- 451 Walls, A. C., Park, Y. J., Tortorici, M. A., Wall, A., McGuire, A. T. and Veesler, D. (2020)  
452 Structure, Function, and Antigenicity of the SARS-CoV-2 Spike Glycoprotein. *Cell*. 2020  
453 Apr 16;181(2):281-292.e6.  
454
- 455 Wang, M., Cao, R., Zhang, L., Yang, X., Liu, J., Xu, M., Shi, Z., Hu, Z., Zhong, W. and Xiao, G.  
456 (2020). Remdesivir and chloroquine effectively inhibit the recently emerged novel  
457 coronavirus (2019-nCoV) in vitro. *Cell research*, 30(3), 269-271.  
458
- 459 Wu, A., Peng, Y., Huang, B., Ding, X., Wang, X., Niu, P., Meng, J., Zhu, Z., Zhang, Z., Wang,  
460 J., Sheng, J., Quan, L., Xia, Z., Tan, W., Cheng, G. and Jiang, T. (2020). Genome  
461 composition and divergence of the novel coronavirus (2019-nCoV) originating in China.  
462 *Cell host & microbe*, 27(3), 325-328.  
463
- 464 Yang, P. L., Gao, M., Lin, K., Liu, Q. and Villareal, V. A. (2011). Anti-HCV drugs in the  
465 pipeline. *Current opinion in virology*, 1(6), 607-616.  
466
- 467 Zheng, Z., Ke, X., Wang, M., He, S., Li, Q., Zheng, C., Zhang, Z., Liu, Y. and Wang, H. (2013)  
468 Human microRNA hsa-miR-296-5p suppresses enterovirus 71 replication by targeting  
469 the viral genome. *J. Virol.* 87, 5645–5656  
470

#### 471 **Declaration of competing interest**

472 Authors declare we have no competing financial or personal interest

473

#### 474 **Acknowledgement**

475 OBM was supported by Pitt-Momentum Fund of the University of Pittsburgh. Ongoing support  
476 by the Division of Biological and Health Sciences, Pitt-Bradford, College of Health Sciences and  
477 Technology, Rochester Institute of Technology is acknowledged APC charges for this article  
478 were fully paid by the University Library System, University of Pittsburgh.

479

#### 480 **Author Contributions**

481 OBM conceptualized and designed the experiments; MSA, OSO, AEB and OBM carried out the  
482 experiments, analyzed the data and drafted the manuscript; MSA, OSO, AG, OAB, MOA, BNT

483 and OBM revised the manuscript, contributed to the discussion and scientific content. All  
484 authors read and approved the final version of the manuscript.

485

#### 486 **Data Availability (see supplementary Tables)**

487

#### 488 **Table Legends**

489 **Table 1.** List of coronaviruses; accession number of their ORF1ab gene, genome location and  
490 the location of RdRp coding sequence within ORF 1ab genome location.

491

492 **Table 2.** Genetic pairwise distance of the 13 coronaviruses used in the study. The least distance  
493 is 0; which is between MERS-CoV and Beta coronavirus England 1; while 5.51 is the highest  
494 pairwise genetic distance and this is between BCoV and Alpha coronavirus bat; and between  
495 Alpha-coronavirus bat and rabbit coronavirus.

496

497 **Table 3.** Predicted miRNAs with regions of complementarity in multiple coronaviruses from  
498 BCoV, MERS-CoV, SARS-CoV and SARS-CoV-2. Number of intercepts shows the number of  
499 miRNA that have complementary region, while the miRNAs are listed under the MiRNA  
500 column.

501

502 **Table 4.** Predicted human miRNAs that have bovine miRNA homologs, their size and strands.  
503 The seed location is with respect to the human miRNA, while the size and strand are the bovine  
504 miRNAs. – strand miRNAs are read in reverse direction

505

506 **Figure Legends**

507 **Figure 1.** Schematics of the ORF 1a and ORF 1b regions of the genomes of SARS-CoV-2,  
508 MERS-CoV, SARS-CoV and BCoV; their encoded non-structural proteins (nsp) and RdRp  
509 layered on one another for easy comparison. The region is highly conserved in the four viruses;  
510 except for BCoV which does not have nsp1. All the nsps are present in the four viruses and they  
511 are arranged in the same sequence/order. Figures created with sketch pad,

512

513 **Figure 2.** Proposed model of miRNA biogenesis and base pairing with coronavirus RdRp  
514 mRNA sequence. The figure gives a description of coronavirus infection of host, and release of  
515 host miRNA to base pair and degrade the virus or inhibit translation. Figure created with sketch  
516 pad.

517

518 **Figure 3.** Flow chart of methodology used for the study. Step by Step pipeline for elucidating  
519 host miRNA – viral RdRp interaction.

520

521 **Figure 4.** Phylogenetic tree showing the evolutionary relationship of 13 coronaviruses. Tree was  
522 constructed using MEGA X.

523

524 **Figure 5.** Bar chart showing the number of predicted human miRNA that can bind with the ORF  
525 1ab region of each of BCoV, MERS-CoV, SARS-CoV and SARS-CoV-2. Figure created  
526 graphpad

527

528 **Figure 6.** Venn Diagram (<http://bioinformatics.psb.ugent.be/webtools/Venn/>) showing the  
529 number of predicted human miRNA that can target multiple coronaviruses. The number in the  
530 intersection/overlapping regions represent the number of miRNAs that can concomitantly target  
531 the coronaviruses represented by the intersected shape. (a). Network connections among  
532 miRNAs and RdRp of SARS\_CoV, B\_CoV, MERS\_CoV and SARS\_CoV-2. B. Generated  
533 using Cytoscape 3.7.2

534

535

536

537

538

539

540

541

542

543

544

545

546

547

548

549

550

551 **Table 1.** List of coronavirus species; accession number of their ORF1ab gene, genome location and the location of RdRp coding  
 552 sequence within ORF 1ab genome location

| S/N | Virus                        | Accession Number | Genome Location of ORF 1ab | Location of RdRp within ORF 1ab |
|-----|------------------------------|------------------|----------------------------|---------------------------------|
| 1   | Tylonycteris bat CoV         | NC_009019.1      | 267-21625                  | 13553-16327                     |
| 2   | SARS-CoV                     | NC_004718.3      | 265..21485                 | 13401-16163                     |
| 3   | MERS-CoV                     | NC_019843.3      | 279-21514                  | 13410-16207                     |
| 4   | Duck coronavirus             | NC_048214.1      | 347..20364                 | 12211-15071                     |
| 5   | Bovine coronavirus           | NC_003045.1      | 211..21494                 | 13318-16100                     |
| 6   | Canada goose CoV             | NC_046965.1      | 554..20085                 | 11971-14786                     |
| 7   | Betacoronavirus England 1    | NC_038294.1      | 278-21513                  | 13400-16185                     |
| 8   | Alphacoronavirus Bat-CoV     | NC_046964.1      | 281-20175                  | 12136-14885                     |
| 9   | Bat CoV                      | NC_034440.1      |                            | 13156-15970                     |
| 10  | Pipistrellus bat coronavirus | NC_009020.1      | 261-21808                  | 13661-16332                     |
| 11  | Rabbit coronavirus           | NC_017083.1      | 209-21663                  | 13483-16270                     |
| 12  | Rodent coronavirus           | NC_046954.1      | 211-21596                  | 13386-16201                     |
| 13  | SARS-CoV-2                   | NC_045512.2      | 266-21555                  | 13430-16221                     |

553

554

555 **Table 2.** Genetic pairwise distance of the 13 coronaviruses used in the study

|                              | Tylonycteris bat coronavirus | SARS-CoV | MERS-CoV | Duck coronavirus | Canada goose coronavirus | B-CoV | Beta-coronavirus England 1 | Alpha-coronavirus bat | Bat coronavirus | Pipistrellus bat coronavirus | Rabbit coronavirus | Rodent coronavirus | SARS-CoV-2 |
|------------------------------|------------------------------|----------|----------|------------------|--------------------------|-------|----------------------------|-----------------------|-----------------|------------------------------|--------------------|--------------------|------------|
| Tylonycteris bat coronavirus |                              |          |          |                  |                          |       |                            |                       |                 |                              |                    |                    |            |
| SARS-CoV                     | 4.36                         |          |          |                  |                          |       |                            |                       |                 |                              |                    |                    |            |
| MERS-CoV                     | 1.8                          | 4.25     |          |                  |                          |       |                            |                       |                 |                              |                    |                    |            |
| Duck coronavirus             | 4.85                         | 5.27     | 4.83     |                  |                          |       |                            |                       |                 |                              |                    |                    |            |
| Canada goose coronavirus     | 4.89                         | 5.17     | 4.81     | 2.34             |                          |       |                            |                       |                 |                              |                    |                    |            |
| B-CoV                        | 4.48                         | 4.92     | 4.52     | 5.28             | 5.14                     |       |                            |                       |                 |                              |                    |                    |            |
| Beta-coronavirus England 1   | 1.8                          | 4.27     | 0        | 4.86             | 4.84                     | 4.55  |                            |                       |                 |                              |                    |                    |            |
| Alpha-coronavirus bat        | 5.1                          | 5.32     | 5.13     | 4.99             | 5.11                     | 5.51  | 5.13                       |                       |                 |                              |                    |                    |            |
| Bat coronavirus              | 1.75                         | 4.33     | 0.18     | 4.76             | 4.93                     | 4.58  | 0.18                       | 4.98                  |                 |                              |                    |                    |            |
| Pipistrellus bat coronavirus | 1.57                         | 4.43     | 1.56     | 5.11             | 5.14                     | 4.61  | 1.62                       | 5.41                  | 1.54            |                              |                    |                    |            |
| Rabbit coronavirus           | 4.49                         | 4.95     | 4.57     | 5.26             | 5.24                     | 0.2   | 4.6                        | 5.51                  | 4.59            | 4.63                         |                    |                    |            |
| Rodent coronavirus           | 4.57                         | 4.83     | 4.58     | 5.26             | 5.21                     | 0.57  | 4.61                       | 5.44                  | 4.56            | 4.71                         | 0.54               |                    |            |
| SARS-CoV-2                   | 4.27                         | 0.29     | 3.97     | 5.21             | 5.07                     | 4.8   | 3.99                       | 5.27                  | 4.21            | 4.34                         | 4.73               | 4.65               |            |

556

557 The least distance is 0; which is between MERS-CoV and Beta coronavirus England 1; while 5.51 is the highest pairwise genetic

558 distance and this is between BCoV and Alpha coronavirus bat; and between Alpha-coronavirus bat and rabbit coronavirus.

559

560

561

562 **Table 3.** Predicted miRNAs with regions of complementarity in multiple coronaviruses from BCoV, MERS-CoV, SARS-CoV and  
 563 SARS-CoV-2

| <b>RdRp from virus</b>       | <b>Number of intercepts</b> | <b>miRNA</b>                                                                                                                           |
|------------------------------|-----------------------------|----------------------------------------------------------------------------------------------------------------------------------------|
| B_Cov   SARS_Cov   SARS_Cov2 | 3                           | hsa-miR-1283 hsa-miR-579-3p hsa-miR-664b-3p                                                                                            |
| SARS_Cov   SARS_Cov2         | 5                           | hsa-miR-4754 hsa-miR-555 hsa-miR-297 hsa-miR-1265 hsa-miR-302c-5p                                                                      |
| B_Cov   SARS_Cov             | 5                           | hsa-miR-4793-5p hsa-miR-302b-5p hsa-miR-556-3p hsa-miR-1248 hsa-miR-302d-5p                                                            |
| MERS_CoV   SARS_Cov          | 1                           | hsa-miR-8081                                                                                                                           |
| B_Cov SARS_Cov2              | 4                           | hsa-miR-4504 hsa-miR-222-5p hsa-miR-567 hsa-miR-936                                                                                    |
| B_Cov MERS_CoV               | 9                           | hsa-miR-7159-5p hsa-miR-585-5p hsa-miR-1305 hsa-miR-195-5p hsa-miR-6507-5p hsa-miR-3065-5p hsa-miR-15a-5p hsa-miR-15b-5p hsa-miR-16-5p |

564  
 565 Number of intercepts show the number of miRNAs with complementary region

566  
 567

568

569



570

571 **Table 4.** Predicted human miRNAs that have bovine miRNA homologs, their size and strands.

| <b>miRNA</b>      | <b>Seed location</b>        | <b>Bovine homolog</b> | <b>Size</b> | <b>Strand</b> |
|-------------------|-----------------------------|-----------------------|-------------|---------------|
| hsa-miR-196a-1-3p | 229, 1027, 1413, 1765, 1940 | bta-miR-196a          | 3 to 20     | -             |
| hsa-miR-654-5p    | 1387                        | bta-miR-380-5p        | 1 to 22     | +             |
| hsa-miR-541-3p    | 1387                        | bta-miR-541           | 1 to 22     | +             |
| hsa-miR-374a-5p   | 1047, 1362, 1370            | bta-miR-374a          | 1 to 22     | +             |
|                   |                             | bta-miR-374b          | 2 to 22     | +             |
|                   |                             | bta-miR-373c          | 1 to 21     | +             |
| hsa-miR-664b-3p   | 1628, 2626                  | bta-miR-664b          | 3 to 23     | +             |
| hsa-miR-545-5p    | 830, 2750                   | bta-miR-545-5p        | 1 to 21     | +             |
| hsa-miR-374b-5p   | 1047, 1362, 1370            | bta-miR-374b          | 1 to 22     | +             |
|                   |                             | bta-miR-374a          | 1 to 22     | +             |
|                   |                             | bta-miR-374c          | 1 to 21     | +             |
| hsa-miR-3065-5p   | 227, 512, 1025              | bta-miR-338           | 1 to 23     | -             |
|                   |                             | bta-miR-3065          | 1 to 23     | +             |

572

573 The seed location is with respect to the human miRNA, while the size and strand are the bovine miRNAs. – strand miRNAs are read

574 in reverse direction

575

576

577

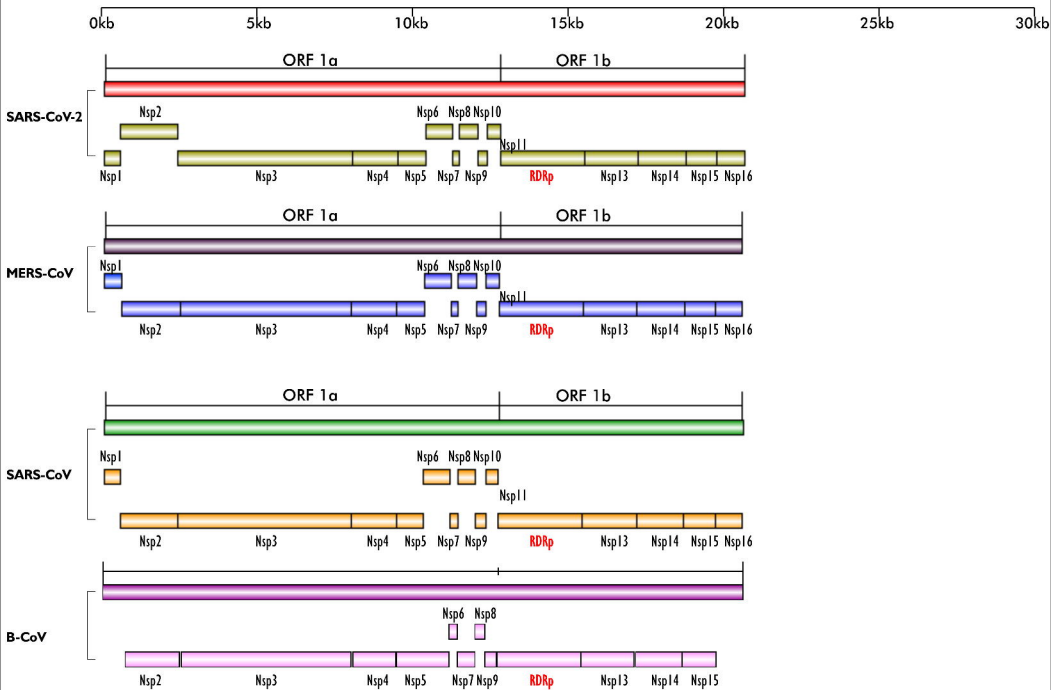

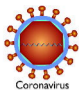

Coronavirus

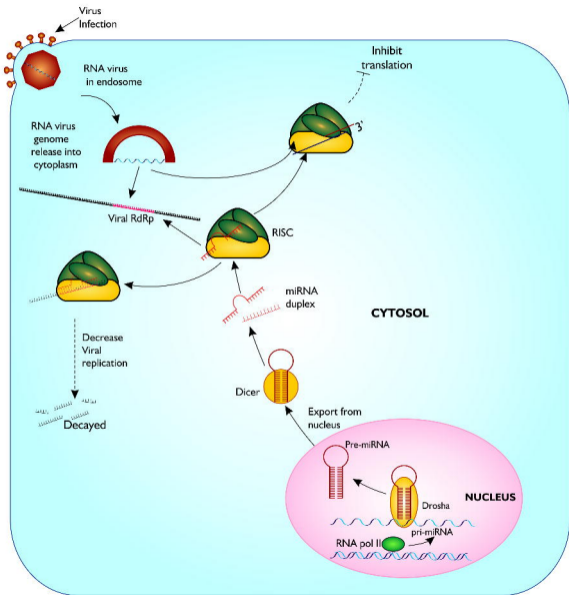

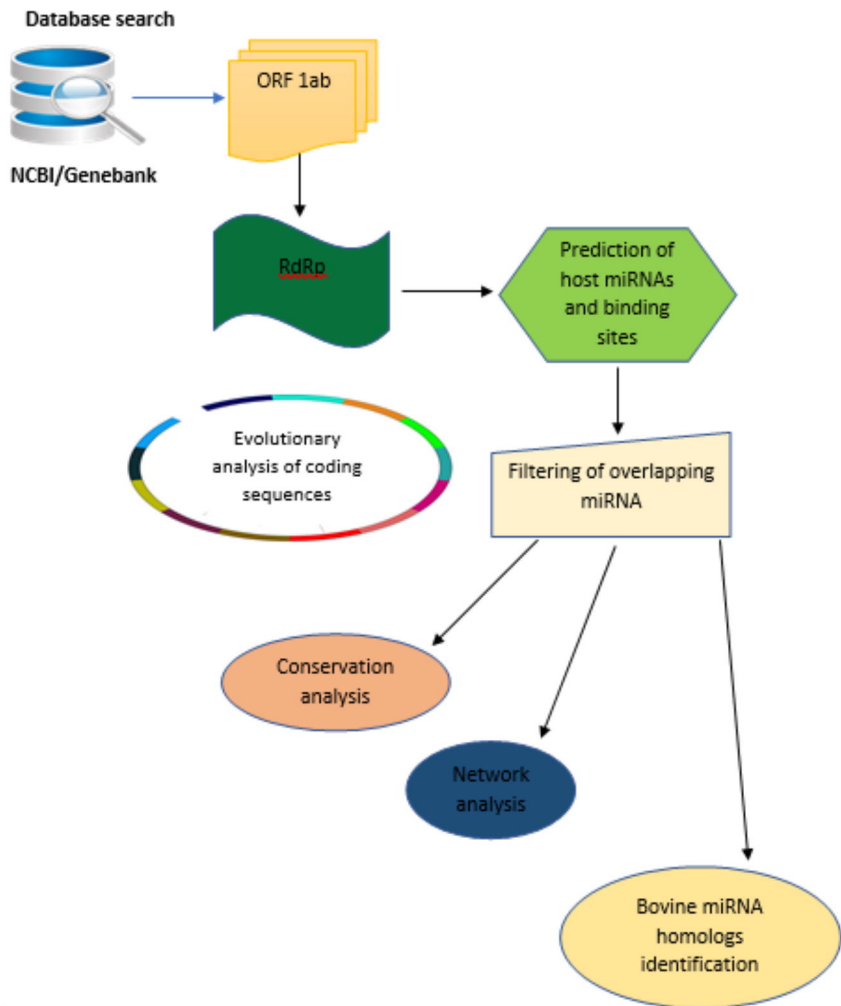

Tree scale: 0.1

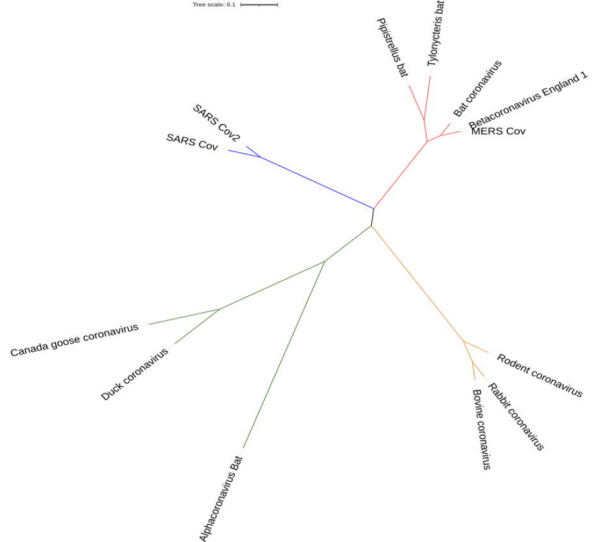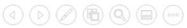

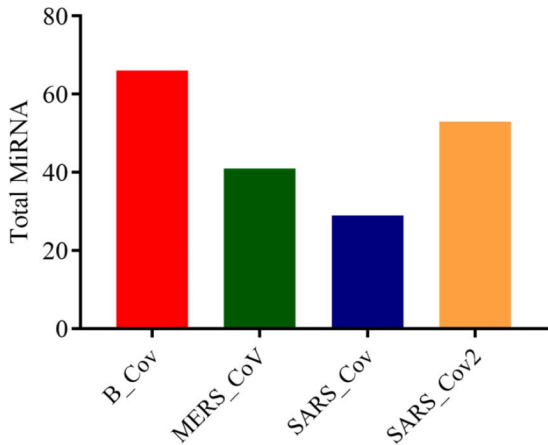

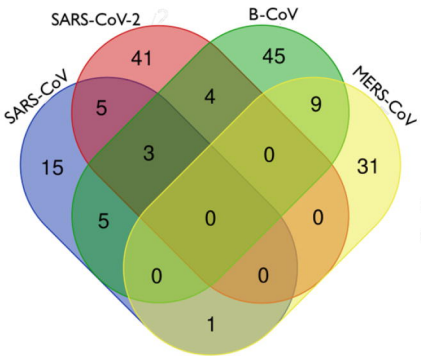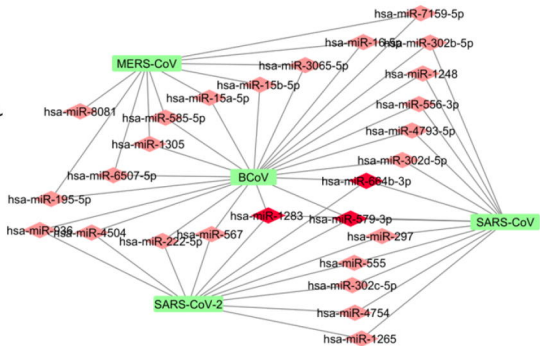

Source: https://www.biorxiv.org/content/10.1101/2022.06.18.496304v1.full.pdf
